# Supplementary material for: Ultra High Speed Rainbow Schlieren Deflectometry for whole field acoustic measurements in supersonic jets
Source: Springer Nature journal article supplement (doi:10.1007/s13300-017-0236-9), 2013-01-01
Supplement: MOESM1 [file 12071926]

Supplementary online material

Table S1: Hypoglycaemic event rates

|                                                 | Hypoglycaemic events per patient per year |        |                     |        |                     |        |
|-------------------------------------------------|-------------------------------------------|--------|---------------------|--------|---------------------|--------|
|                                                 | T1DM                                      |        | T2DM <sub>BOT</sub> |        | T2DM <sub>B/B</sub> |        |
|                                                 | Non-severe                                | Severe | Non-severe          | Severe | Non-severe          | Severe |
| <b>Base-case event rates</b>                    |                                           |        |                     |        |                     |        |
| T1DM UKHSG [26] T1DM (<15 years)                | 29.0                                      | 3.2    | –                   | –      | –                   | –      |
| T2DM <sub>BOT</sub> UKHSG [26] T2DM (<2 years)  | –                                         | –      | 4.08                | 0.1    | –                   | –      |
| T2DM <sub>B/B</sub> UKHSG [26] T2DM (>5 years)  | –                                         | –      | –                   | –      | 10.2                | 0.7    |
| <b>Event rates used in sensitivity analyses</b> |                                           |        |                     |        |                     |        |
| UKHSG [26] T1DM (<5 years)                      | 35.5                                      | 1.1    | –                   | –      | –                   | –      |
| UKHSG [26] T2DM (>5 years)                      | –                                         | –      | 10.2                | 0.7    | –                   | –      |
| UKHSG [26] T2DM (<2 years)                      | –                                         | –      | –                   | –      | 4.08                | 0.1    |
| Clinical trial                                  | 53.85                                     | 0.27   | 2.05                | 0.015  | 13.58               | 0.052  |
| Donnelly 2005 [49]                              | 41.74                                     | 1.15   | 16.02               | 0.35   | 16.02               | 0.35   |
| Dornhorst 2007 [40]                             | 44.1                                      | 3.0    | 8.3                 | 0.8    | 8.3                 | 0.8    |
| Frier 2015 [41]                                 | 126.7                                     | 0.87   | 29.1                | 0.15   | 48                  | 0.324  |

Abbreviations: UKHSG, United Kingdom Hypoglycaemia Study Group

**Table S2: One-way sensitivity analyses for T1DM, T2DM<sub>BOT</sub> and T2DM<sub>B/B</sub>**

| T1DM                                                                                 |                                                      | ΔCost (£) | ΔQALY  | ICER (£/QALY)        |
|--------------------------------------------------------------------------------------|------------------------------------------------------|-----------|--------|----------------------|
| <b>One Way Sensitivity Analysis</b>                                                  |                                                      |           |        |                      |
| <b>Base case analysis</b><br>UKHSG hypo rates, published hypo costs                  |                                                      | -41.23    | 0.0044 | Dominant             |
| <b>Hypoglycaemia rates</b><br>Base case UKHSG: Non-severe: 29/year; severe: 3.2/year | Clinical trial data: non-severe: 53.85, severe: 0.27 | -43.13    | 0.0082 | Dominant             |
|                                                                                      | UKHSG (<5yrs): non-severe: 35.5, severe: 1.1         | -41.73    | 0.0054 | Dominant             |
|                                                                                      | Donnelly 2005 [49]: non-severe: 41.74, severe: 1.15  | -42.20    | 0.0064 | Dominant             |
|                                                                                      | Dornhorst 2007 [40]: non-severe: 44.1, severe: 3     | -42.38    | 0.0067 | Dominant             |
|                                                                                      | Frier 2015 [41]: non-severe: 126.7, severe: 0.87     | -48.68    | 0.0193 | Dominant             |
| <b>Hypoglycaemia distribution</b><br>Base case: nocturnal hypoglycaemia =13.36%      | Nocturnal proportion of hypoglycaemia: 25% (+50%)    | -43.16    | 0.0083 | Dominant             |
|                                                                                      | Nocturnal proportion of hypoglycaemia: 7% (-50%)     | -40.18    | 0.0023 | Dominant             |
| <b>Hypoglycaemia disutility</b><br>Base case Evans 2013                              | Currie 2006 disutilities [31]                        | -41.23    | 0.0023 | Dominant             |
| <b>Treatment cost</b><br>Base case: IGlAr = £41.50/pack                              | IGlar price -15%                                     | 8.94      | 0.0044 | 2,026.66             |
|                                                                                      | IGlar price +15%                                     | -91.40    | 0.0044 | Dominant             |
| <b>Injection Frequency</b><br>Base case: IGlAr 1/day, IDeg 1/day                     | IGlar: BID                                           | -76.62    | 0.0044 | Dominant             |
|                                                                                      | Weighted (25.44% IGlAr BID)*                         | -50.23    | 0.0044 | Dominant             |
| <b>Insulin doses</b><br>Base case = 33.1/35 units/day (glar/asp)<br>Ratio 0.87/0.85  | Equal doses (1:1 rate ratio)                         | 38.89     | 0.0044 | 8,813.21             |
|                                                                                      | IGlar dose from EOT dose in Heller 2009 [50]         | -39.77    | 0.0044 | Dominant             |
| <b>Hypoglycaemia costs</b><br>Base case = published                                  | Clinical trial derived                               | -39.58    | 0.0044 | Dominant             |
|                                                                                      | Clinical trial derived, Currie disutilities          | -39.58    | 0.0023 | Dominant             |
| <b>2 year extension data</b>                                                         | Trial 3644 [51]                                      | -6.15     | 0.0044 | Dominant             |
| <b>No hypo benefit</b>                                                               | Hypoglycaemia risk ratio = 1                         | -39.02    | -      | Cannot be calculated |
| <b>Flexible dosing utility</b>                                                       | Published Evans 2013 (0.013) [32]                    | -41.23    | 0.0174 | Dominant             |
|                                                                                      | Published Boye 2011 (0.006) [33]                     | -41.23    | 0.0104 | Dominant             |
| <b>IGlar U300</b>                                                                    | Toujeo® price, 15% basal insulin dose increase       | -47.94    | 0.0044 | Dominant             |

| T1DM |                                                                                 | $\Delta$ Cost (£) | $\Delta$ QALY | ICER (£/QALY)        |
|------|---------------------------------------------------------------------------------|-------------------|---------------|----------------------|
|      | Toujeo® price, 17.5% basal insulin dose increase [37]                           | -55.36            | 0.0044        | Dominant             |
|      | Toujeo® price, 17.5% basal insulin dose increase [37], no hypoglycaemia benefit | -53.15            | -             | Cannot be calculated |

| T2DM <sub>BOT</sub>                                                                    |                                                      | $\Delta$ Cost (£) | $\Delta$ QALY | ICER (£/QALY)        |
|----------------------------------------------------------------------------------------|------------------------------------------------------|-------------------|---------------|----------------------|
| <b>One Way Sensitivity Analysis</b>                                                    |                                                      |                   |               |                      |
| <b>Base case analysis</b><br>UKHSG hypo rates,<br>published hypo costs                 |                                                      | -32.37            | 0.0073        | Dominant             |
| <b>Hypoglycaemia rates</b><br>Base case UKHSG: Non-severe: 4.08/year; severe: 0.1/year | Clinical trial data: non-severe: 2.05, severe: 0.015 | -0.96             | 0.0019        | Dominant             |
|                                                                                        | UKHSG (>5yrs): non-severe: 10.2, severe: 0.7         | -249.49           | 0.0401        | Dominant             |
|                                                                                        | Donnelly 2005 [49]: non-severe: 16.02, severe: 0.35  | -128.13           | 0.0265        | Dominant             |
|                                                                                        | Dornhorst 2007 [40]: non-severe: 8.3, severe: 0.8    | -284.03           | 0.0438        | Dominant             |
|                                                                                        | Frier 2015 [41]: non-severe: 29.1, severe: 0.15      | -64.28            | 0.0246        | Dominant             |
| <b>Hypoglycaemia distribution</b><br>Base case: nocturnal hypoglycaemia =24.66%        | Nocturnal proportion of hypoglycaemia: 12.33% (-50%) | -31.22            | 0.0061        | Dominant             |
|                                                                                        | Nocturnal proportion of hypoglycaemia: 37% (+50%)    | -33.52            | 0.0085        | Dominant             |
| <b>Hypoglycaemia disutility</b><br>Base case Evans 2013                                | Currie 2006 disutilities [31]                        | -32.37            | 0.0023        | Dominant             |
| <b>Treatment cost</b><br>Base case: IGl <sub>ar</sub> = £41.50/pack                    | IGlar price -15%                                     | 45.99             | 0.0073        | 6,312.79             |
|                                                                                        | IGlar price +15%                                     | -110.74           | 0.0073        | Dominant             |
| <b>Injection Frequency</b><br>Base case: IGl <sub>ar</sub> 1/day, IDeg 1/day           | IGlar: BID                                           | -67.77            | 0.0073        | Dominant             |
|                                                                                        | Weighted (23.51% IGl <sub>ar</sub> BID)*             | -40.80            | 0.0073        | Dominant             |
| <b>Insulin doses</b><br>Base case = 51.7 units/day (IGlar)<br>Ratio 0.90               | Equal doses (1:1 rate ratio)                         | 26.29             | 0.0073        | 3,608.66             |
|                                                                                        | Published doses Riddle 2003 [52], trial ratios       | -32.85            | 0.0073        | Dominant             |
|                                                                                        | Published doses Riddle 2003 [52], equal doses        | 20.70             | 0.0073        | 2,841.64             |
| <b>Hypoglycaemia costs</b><br>Base case = published                                    | Clinical trial derived                               | -39.10            | 0.0044        | Dominant             |
| <b>No hypo benefit</b>                                                                 | Hypoglycaemia risk ratio = 1                         | 5.54              | -             | Cannot be calculated |

| T2DM <sub>BOT</sub>     |                                                                              | ΔCost (£) | ΔQALY  | ICER (£/QALY)        |
|-------------------------|------------------------------------------------------------------------------|-----------|--------|----------------------|
| Flexible dosing utility | Published Evans 2013 (0.013) [32]                                            | -32.37    | 0.0203 | Dominant             |
|                         | Published Boye 2011 (0.006) [33]                                             | -32.37    | 0.0133 | Dominant             |
| IGlar U300              | Toujeo price, 17% basal insulin dose increase [53]                           | -52.12    | 0.0073 | Dominant             |
|                         | Toujeo price, 17% basal insulin dose increase [53], no hypoglycaemia benefit | -14.21    | -      | Cannot be calculated |

| T2DM <sub>B/B</sub>                                                                    |                                                         | ΔCost (£) | ΔQALY  | ICER (£/QALY)        |
|----------------------------------------------------------------------------------------|---------------------------------------------------------|-----------|--------|----------------------|
| <b>One Way Sensitivity Analysis</b>                                                    |                                                         |           |        |                      |
| <b>Base case analysis</b><br>UKHSG hypo rates >5 years, published hypo costs           |                                                         | 135.05    | 0.0084 | 15,983.37            |
| <b>Hypoglycaemia rates</b><br>Base case UKHSG: Non-severe: 10.2/year; severe: 0.7/year | Clinical trial data: non-severe: 13.58, severe: 0.05    | 132.35    | 0.0113 | 11,764.60            |
|                                                                                        | Donnelly 2005 [49]: non-severe: 16.02, severe: 0.35     | 130.41    | 0.0133 | 9,827.57             |
|                                                                                        | Dornhorst 2007 [40]: non-severe: 8.3, severe: 0.8       | 136.56    | 0.0069 | 19,862.19            |
|                                                                                        | Frier 2015 [41]: non-severe: 48, severe: 0.324          | 104.96    | 0.0398 | 2,639.73             |
| <b>Hypoglycaemia distribution</b><br>Base case: nocturnal hypoglycaemia =13.36%        | Nocturnal proportion of hypoglycaemia: 7% (-50%)        | 134.58    | 0.0089 | 15,076.91            |
|                                                                                        | Nocturnal proportion of hypoglycaemia: 25% (+50%)       | 135.51    | 0.0080 | 16,998.39            |
| <b>Hypoglycaemia disutility</b><br>Base case Evans 2013                                | Currie 2006 disutilities [31] (published hypo costs)    | 135.05    | 0.0065 | 20,928.97            |
| <b>Treatment cost</b><br>Base case: IGlar = £41.50/pack                                | IGlar price -15%                                        | 236.00    | 0.0084 | 27,931.53            |
|                                                                                        | IGlar price +15%                                        | 34.09     | 0.0084 | 4,035.21             |
| <b>Injection Frequency</b><br>Base case: IGlar 1/day, IDeg 1/day                       | IGlar: 2/day                                            | 99.65     | 0.0084 | 11,794.45            |
|                                                                                        | Weighted (20.98% IGlar BID)*                            | 127.62    | 0.0084 | 15,104.53            |
| <b>Insulin doses</b><br>Base case = 66.6/72.7 units/day (glar/asp)<br>Ratio 1.08/1.00  | Equal doses (1:1 rate ratio)                            | 74.59     | 0.0084 | 8,827.91             |
|                                                                                        | IGlar dose from EOT dose in Hollander 2008 [54]         | 107.96    | 0.0084 | 12,777.69            |
|                                                                                        | EOT IGlar dose Hollander 2008 [54]; assumed equal doses | 58.94     | 0.0084 | 6,975.97             |
| <b>No hypo benefit</b>                                                                 | Hypoglycaemia risk ratio = 1                            | 143.16    | -      | Cannot be calculated |
| <b>Flexible dosing utility</b>                                                         | Published Evans 2013 (0.013) [32]                       | 135.05    | 0.0214 | 6,296.08             |

| <b>T2DM<sub>B/B</sub></b> |                                                                              | <b>ΔCost<br/>(£)</b> | <b>ΔQALY</b> | <b>ICER<br/>(£/QALY)</b> |
|---------------------------|------------------------------------------------------------------------------|----------------------|--------------|--------------------------|
|                           | Published Boye 2011 (0.006) [33]                                             | 135.05               | 0.0144       | 9,346.27                 |
| <b>IGlar U300</b>         | Toujeo price, 10% basal insulin dose increase [39]                           | 151.39               | 0.0084       | 17,917.68                |
|                           | Toujeo price, 10% basal insulin dose increase [39], no hypoglycaemia benefit | 159.51               | –            | Cannot be calculate      |
